# Supplementary material
Source: PubMed Central journal article supplement (PMC6168916)
Supplement: supplementary_table1.pdf [file supplementary_table1.pdf]

Summary of all data shown in figures

| Figure | Measure             | Mean   | SD                | N     | Mean   | SD             | N     | Mean  | SD        | N     | Mean  | SD      | N  |
|--------|---------------------|--------|-------------------|-------|--------|----------------|-------|-------|-----------|-------|-------|---------|----|
| 3A     | Trials to Criterion |        | Sham              |       |        | MD             |       |       | 2VO       |       |       | MD+2VO  |    |
|        | ID                  | 28.60  | 8.81              | 15    | 25.00  | 10.54          | 13    | 24.57 | 11.04     | 14    | 22.25 | 6.77    | 12 |
|        | ED                  | 20.87  | 8.90              | 15    | 29.46  | 9.93           | 13    | 28.43 | 13.93     | 14    | 27.75 | 10.23   | 12 |
| 3B     | Trials to Criterion |        | Sham              |       |        | MD             |       |       | 2VO       |       |       | MD+2VO  |    |
|        | SD                  | 16.69  | 6.30              | 13    | 21.08  | 10.72          | 13    | 13.92 | 4.84      | 13    | 19.17 | 10.12   | 12 |
|        | CD                  | 15.00  | 8.40              | 15    | 14.77  | 11.89          | 13    | 14.43 | 7.01      | 14    | 15.33 | 7.48    | 12 |
|        | REV1                | 33.80  | 17.90             | 15    | 36.15  | 13.12          | 13    | 35.36 | 16.25     | 14    | 33.92 | 10.25   | 12 |
|        | REV2                | 23.07  | 8.85              | 14    | 24.38  | 7.67           | 13    | 29.92 | 7.62      | 13    | 26.08 | 10.10   | 12 |
| LI     | 12.08               | 7.22   | 13                | 12.08 | 5.07   | 12             | 11.67 | 3.31  | 12        | 11.27 | 5.93  | 11      |    |
| 3C     | Trials to Criterion |        | Sham              |       |        | MD             |       |       |           |       |       |         |    |
|        | ID                  | 27.63  | 8.80              | 24    | 24.82  | 8.73           | 22    |       |           |       |       |         |    |
|        | ED                  | 19.13  | 8.54              | 24    | 26.59  | 8.59           | 22    |       |           |       |       |         |    |
| 3D     | Trials to Criterion |        | Control           |       |        | HFSS           |       |       |           |       |       |         |    |
|        | ID                  | 25.28  | 7.40              | 18    | 26.93  | 9.64           | 28    |       |           |       |       |         |    |
|        | ED                  | 19.33  | 6.53              | 18    | 24.86  | 10.20          | 28    |       |           |       |       |         |    |
| 3E     | Trials to Criterion |        | Control           |       |        | HFSS           |       |       |           |       |       |         |    |
|        | REV1                | 30.50  | 11.02             | 18    | 34.89  | 15.62          | 28    |       |           |       |       |         |    |
|        | REV2                | 17.88  | 3.46              | 16    | 23.70  | 8.17           | 27    |       |           |       |       |         |    |
| 3F     | Trials to Criterion |        | Control           |       |        | HFSS           |       |       |           |       |       |         |    |
|        | SD                  | 15.89  | 6.38              | 18    | 18.88  | 8.90           | 26    |       |           |       |       |         |    |
|        | CD                  | 16.61  | 8.92              | 18    | 14.89  | 9.97           | 28    |       |           |       |       |         |    |
|        | LI                  | 9.33   | 2.19              | 12    | 12.08  | 6.15           | 25    |       |           |       |       |         |    |
| 4A     | Blood Pressure      | 154.09 | Control<br>15.25  | 11    | 176.33 | HFSS<br>25.44  | 9     |       |           |       |       |         |    |
| 4B     | Heart Rate          | 4.74   | Control<br>0.65   | 20    | 5.17   | HFSS<br>0.76   | 19    |       |           |       |       |         |    |
| 4C     | Blood Glucose       |        | Cont+Sham         |       |        | Cont+MD        |       |       | HFSS+Sham |       |       | HFSS+MD |    |
|        | Fasting             | 5.37   | 0.49              | 15    | 5.44   | 0.52           | 15    | 5.96  | 0.72      | 25    | 5.90  | 0.30    | 17 |
|        | 10                  | 18.69  | 4.42              | 15    | 18.15  | 4.29           | 15    | 15.34 | 2.92      | 25    | 18.50 | 1.95    | 17 |
|        | 30                  | 16.73  | 3.76              | 15    | 16.23  | 4.06           | 15    | 12.88 | 3.04      | 25    | 13.62 | 2.78    | 17 |
|        | 60                  | 9.59   | 2.79              | 15    | 9.99   | 3.27           | 15    | 8.88  | 2.26      | 25    | 8.48  | 1.44    | 17 |
| 120    | 6.33                | 0.84   | 15                | 6.77  | 1.79   | 15             | 6.52  | 1.13  | 25        | 6.28  | 0.48  | 17      |    |
| 4D     | Insulin             | 1.18   | Control<br>0.31   | 21    | 1.30   | HFSS<br>0.30   | 8     |       |           |       |       |         |    |
| 5D     | Velocity            | 601.50 | Control<br>145.87 | 20    | 585.47 | HFSS<br>279.65 | 19    |       |           |       |       |         |    |
| 5I     | Blockage            | 0.06   | Control<br>0.06   | 20    | 0.11   | HFSS<br>0.08   | 19    |       |           |       |       |         |    |
| 5J     | 5% Blockage         | 0.37   | Control<br>0.19   | 18    | 0.57   | HFSS<br>0.25   | 17    |       |           |       |       |         |    |
| 5K     | Capillary Diameter  | 4.02   | Control<br>0.50   | 20    | 4.38   | HFSS<br>0.61   | 19    |       |           |       |       |         |    |
| 6A     | Parenchyma Volume   | 751.58 | Control<br>33.74  | 14    | 757.11 | HFSS<br>25.36  | 26    |       |           |       |       |         |    |
| 6B     | Ventricle Volume    | 10.36  | Control<br>3.76   | 14    | 13.60  | HFSS<br>7.95   | 26    |       |           |       |       |         |    |
| 6C     | White Matter Volume | 45.20  | Control<br>3.71   | 20    | 42.56  | HFSS<br>5.09   | 17    |       |           |       |       |         |    |
| 6D     | ED-1                | 1.13   | Control<br>0.81   | 14    | 0.74   | HFSS<br>0.71   | 10    |       |           |       |       |         |    |
