# Supplementary material
Source: PubMed Central journal article supplement (PMC6168916)
Supplement: supplementary_table2.pdf [file supplementary_table2.pdf]

### Cytokine Analysis

---

| Analyte<br>(picograms/mL) | Chow Condition (n=16) |        | HFSS Condition (n=18) |        |
|---------------------------|-----------------------|--------|-----------------------|--------|
|                           | Mean                  | SD     | Mean                  | SD     |
| IL-1 $\alpha$             | 790.77                | 138.99 | 786.64                | 159.76 |
| IL-1 $\beta$              | 822.11                | 158.92 | 749.68                | 139.59 |
| IL-2                      | 884.37                | 117.56 | 883.35                | 169.57 |
| IL-6                      | 719.54                | 138.14 | 657.82                | 114.72 |
| IL-7                      | 958.43                | 200.97 | 1162.57               | 474.41 |
| IL-18                     | 813.74                | 116.16 | 773.02                | 120.39 |
| IFN-g                     | 786.03                | 117.94 | 776.07                | 142.56 |
| GM-CSF                    | 814.26                | 139.41 | 821.29                | 159.24 |
| TNF- $\alpha$             | 593.88                | 179.39 | 480.24                | 156.25 |
| VEGF                      | 1026.09               | 205.25 | 1174.66               | 244.90 |

---
