# Supplementary material
Source: PubMed Central journal article supplement (PMC6168916)

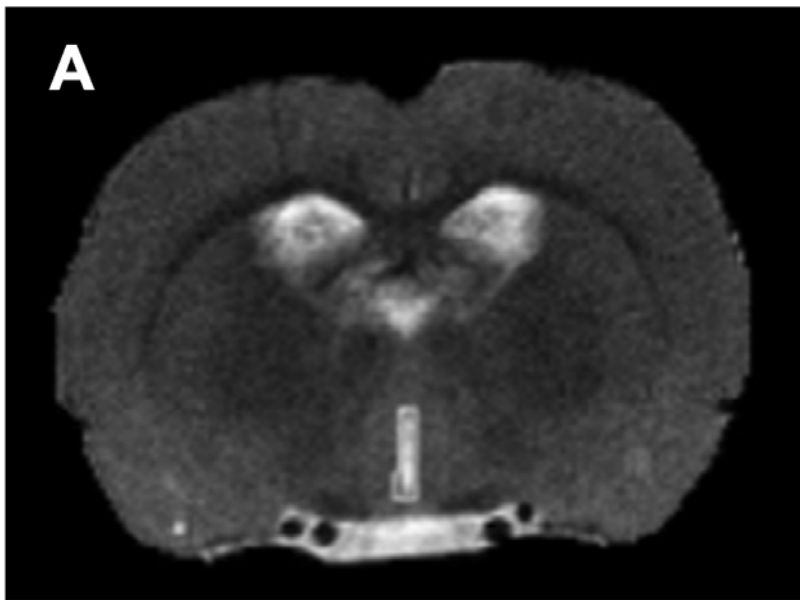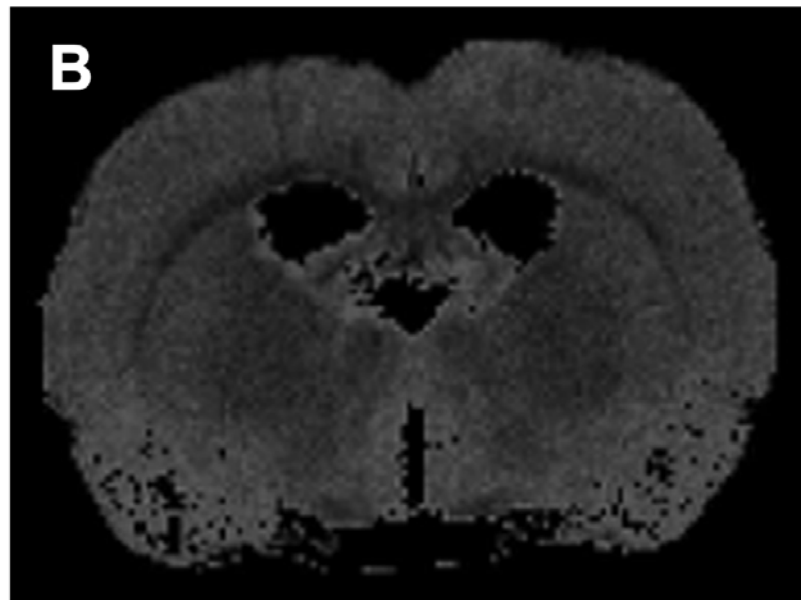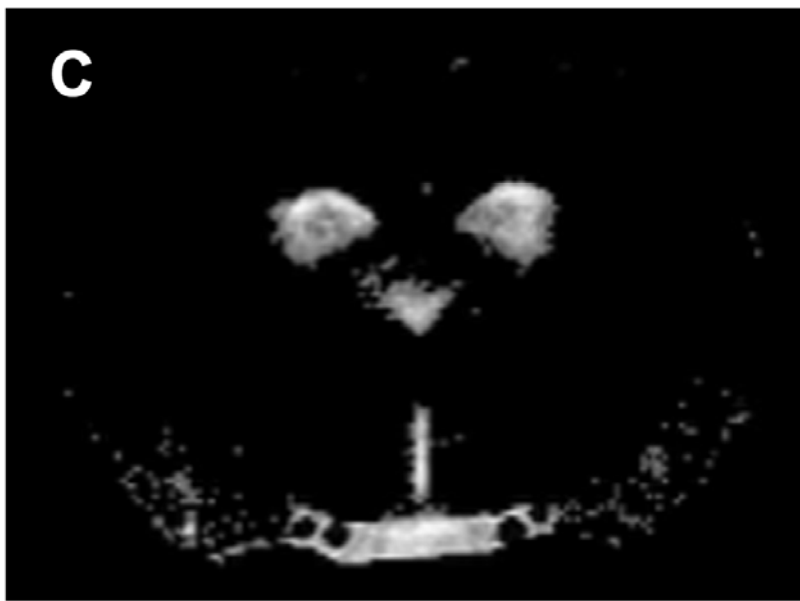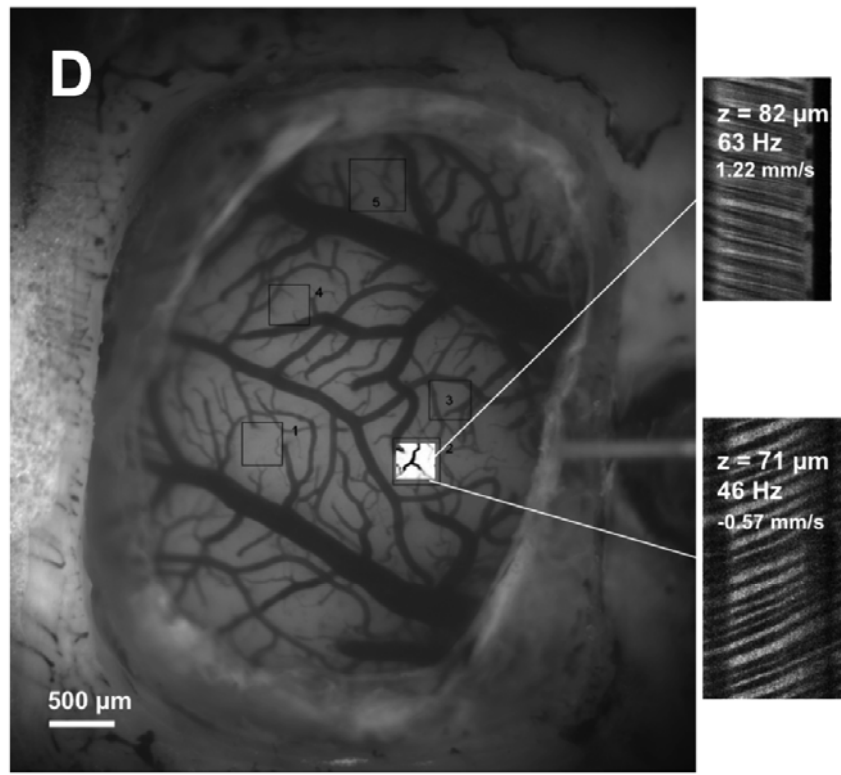

Supplement: supplementary_figure2.pdf [file supplementary_figure2.pdf]
